# Supplementary material for: MRI of Breast Tumor Initiating Cells Using the Extra Domain-B of Fibronectin Targeting Nanoparticles
Source: PubMed Central journal article supplement — Theranostics. 2014 Jun 10;4(8):845–57. doi: 10.7150/thno.8343 (PMC4063982; doi:10.7150/thno.8343), 2014-06-10

**Supplementary Figure 1. A schematic representation of aptide structure and the sequences of the corresponding aptides.**

**Supplementary Figure 2. UV-Vis absorption spectra of filtrates that were obtained after the filtration of the indicated solutions using a centrifugal filter (MW cut-off, 50 kDa).**

**Supplementary Figure 3. Changes in the hydrodynamic size of APT<sub>EDB</sub>-TCL-SPIONs incubated in distilled water or cell culture medium containing 10% FBS for 6 days.**

**Supplementary Figure 4. *in vitro* MRI of cell phantoms at different cell numbers.** (A) T<sub>2</sub>-weighted image of phantoms consisting of 0 ~ 5 x 10<sup>6</sup> NDY-1 cells treated with APT<sub>EDB</sub>-TCL-SPION for 12 h. (B) The plot of transverse relaxation rate (R<sub>2</sub>) measured from NDY-1 cell phantoms.

**Supplementary Figure 4. *In vitro* MRI of cell phantoms at different cell numbers.** (A)  $T_2$ -weighted image of NDY-1 cell phantoms of different cell numbers. (B) Plot of transverse relaxation rates ( $R_2$ ) measured from NDY-1 cell phantoms.

**Supplementary Figure 5. MRIs of tumors obtained from mice injected with TCL-SPION.** (A) Representative  $T_2^*$ -weighted multi-slice images of the NDY-1 tumors obtained from mice prior to injection and at 4 h and 24 h after the intravenous injection of TCL-SPION (20 mg Fe/kg). (B) The changes in signal intensity on  $T_2^*$ -weighted images of tumor, liver, spleen, and kidney.

**Supplementary Figure 6. Biodistribution analysis of  $APT_{EDB}$ -TCL-SPION and  $APT_{scramble}$ -TCL-SPION.** Representative Prussian blue staining of brain, heart, liver, spleen, kidney and thigh muscle isolated from non-tumor-bearing mice at 24 h post-injection with  $APT_{EDB}$ -TCL-SPION and  $APT_{scramble}$ -TCL-SPION. Accumulated iron was detected as a blue dot in microsections of the liver and spleen. Scale bar: 100  $\mu$ m

Supplementary Figure 1

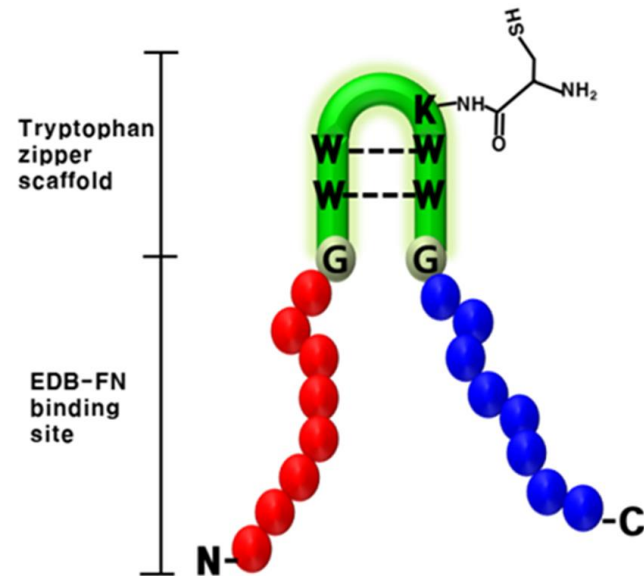

**cys-APT<sub>EDB</sub>:** NH<sub>2</sub>-**HSSSSPIQGSWTWENGK(cys)WTWKGIIIRLEQQP**-COOH

**Cy3.3-APT<sub>EDB</sub>:** NH<sub>2</sub>-**HSSSSPIQGSWTWENGK(cys-Cy3.3)WTWKGIIIRLEQQP**-COOH

**cys-APT<sub>scramble</sub>:** NH<sub>2</sub>-**HASDRNGSWTWENGK(cys)WTWKGILHEQSD**-COOH

Supplementary Figure 2

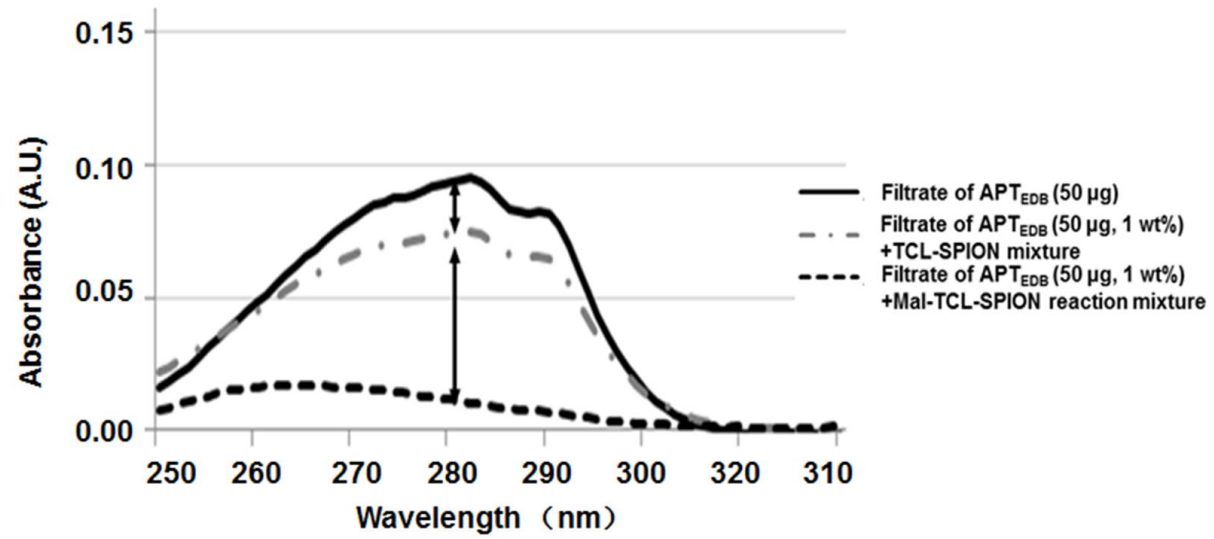

Supplementary Figure 3

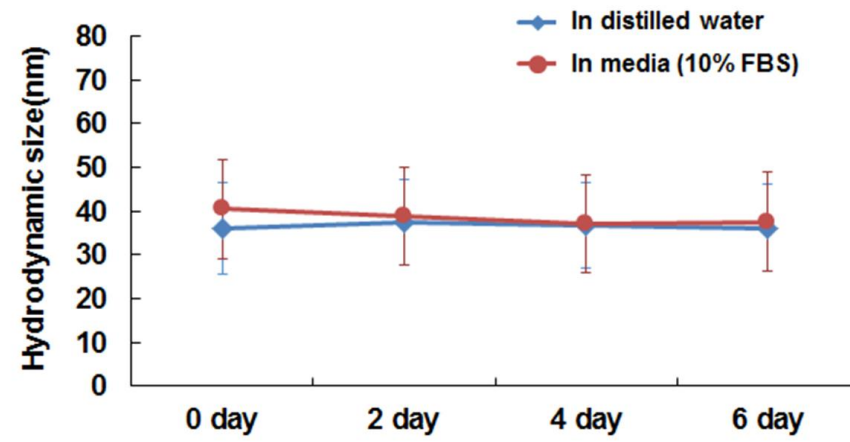

Supplementary Figure 4

A

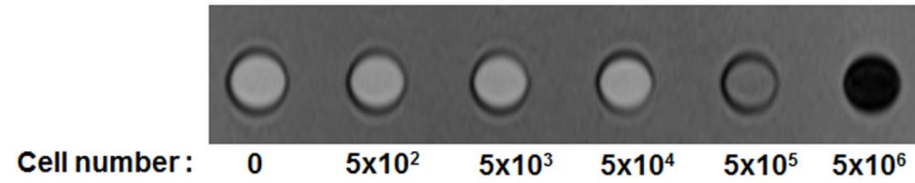

B

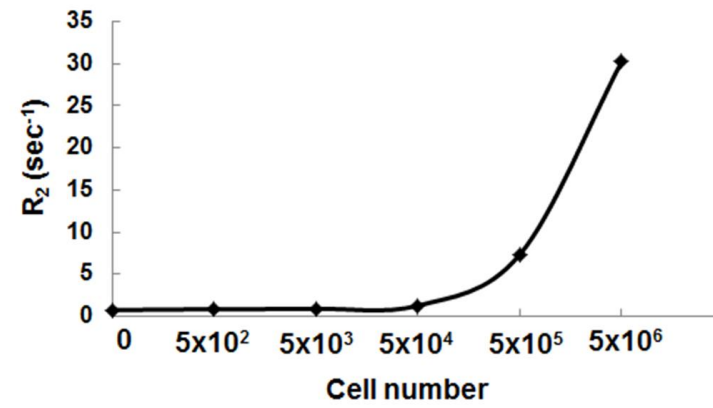

Supplementary Figure 5

**A**

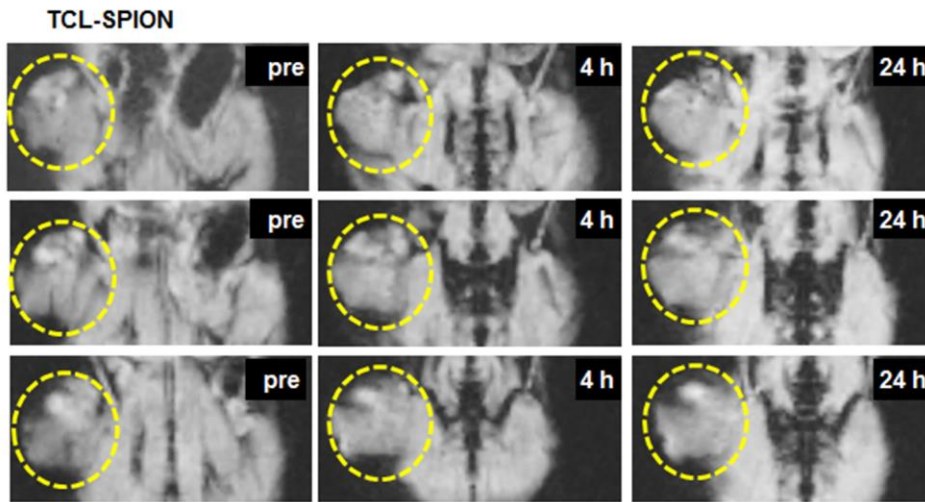

**B**

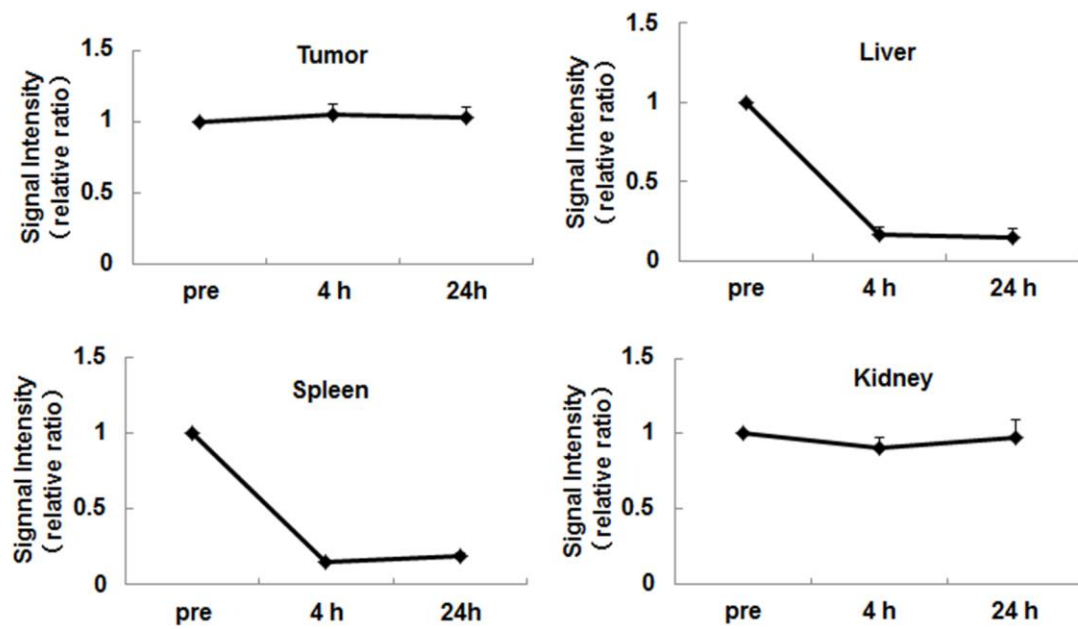

Supplementary Figure 6

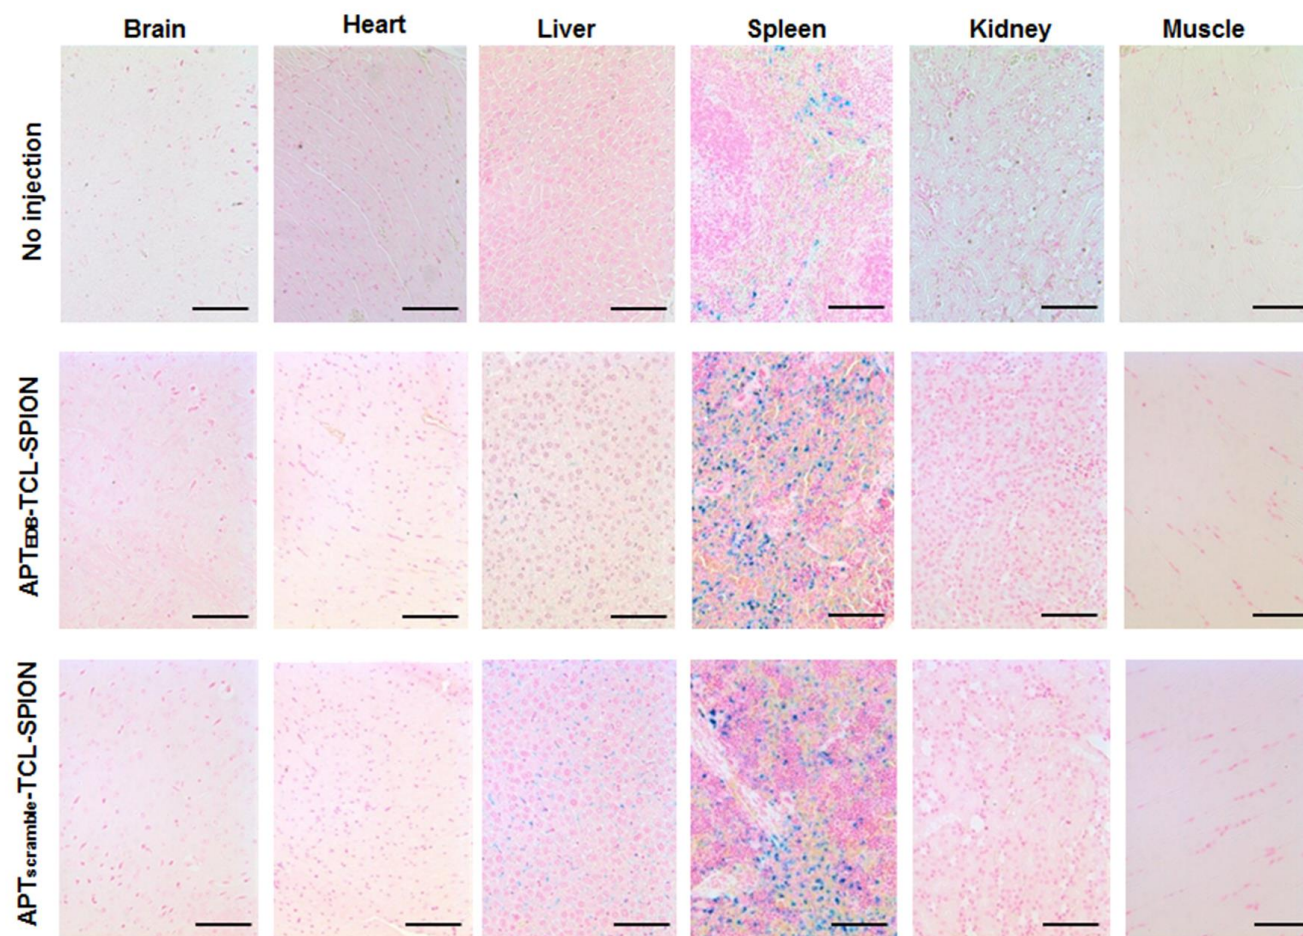

Supplement: thnov04p0845s1.pdf [file thnov04p0845s1.pdf]
